# Supplementary material for: MGP: a new 1-hourly 0.25° global precipitation product (2000–2020) based on multi-source precipitation data fusion
Source: Copernicus journal article supplement (doi:10.5194/essd-2023-42), 2023-02-14
Supplement: Supplementary file 1 [file essd-2023-42-supplement.pdf]

**Table S1** An overview of the currently popular (quasi)global precipitation products. Abbreviations: satellite (S); reanalysis (R); gauge (G). “global” denotes that the precipitation information covers full global coverage, while “land” indicates that the precipitation information only limits in land surface.

| Data type | Name         | Full name                                                                          | Data source (s) | Temporal resolution | Spatial resolution | Temporal coverage | Spatial coverage | Reference (s)         |
|-----------|--------------|------------------------------------------------------------------------------------|-----------------|---------------------|--------------------|-------------------|------------------|-----------------------|
| Satellite | IMERG-Late   | Integrated Multisatellite Retrievals for Global Precipitation Measurement Late Run | S               | 30 min              | 0.1°               | 2000-NRT          | 60°N/S           | Huffman et al. (2019) |
|           | TMPA 3B42RT  | TRMM Multi-satellite Precipitation Analysis (TMPA) 3B42RT V7                       | S               | 3 hourly            | 0.25°              | 2000-2020         | 50°N/S           | Huffman et al. (2007) |
|           | GSMaP-MVK    | Global Satellite Mapping of Precipitation Moving Vector with Kalman                | S               | Hourly              | 0.1°               | 2000-NRT          | 60°N/S           | Ushio et al. (2009)   |
|           | PERSIANN-CCS | Precipitation Estimation from Remotely Sensed Information using Artificial Neural  | S               | Hourly              | 0.04°              | 2003-NRT          | 60°N/S           | Hong et al. (2004)    |

---

|            |                                      |                                                                                            |   |          |         |              |        |                         |
|------------|--------------------------------------|--------------------------------------------------------------------------------------------|---|----------|---------|--------------|--------|-------------------------|
|            | Networks-Cloud Classification System |                                                                                            |   |          |         |              |        |                         |
|            | CHIRP                                | Climate Hazards group Infrared Precipitation                                               | S | Daily    | 0.05°   | 1981-present | 50°N/S | Funk et al. (2015)      |
|            | CMORPH                               | CPC morphing technique (CMORPH) V1.0 and V0.x                                              | S | 30 min   | 8 km    | 1998-NRT     | 60°N/S | Joyce et al. (2004)     |
|            | SM2RAIN-ASCAT                        | Based on ASCAT data                                                                        | S | Daily    | 0.5°    | 2007-2015    | Global | Brocca et al. (2014)    |
|            | GridSat                              | Derived from the Gridded Satellite (GridSat) B1 infrared archive V02R01 using CDF matching | S | 3 hourly | 0.1°    | 1980-2016    | 70°N/S | Knapp et al. (2011)     |
| Reanalysis | ERA5                                 | Fifth generation of ECMWF atmospheric reanalyses of the global climate                     | R | Hourly   | 0.25°   | 1959-present | Global | C3S (2017)              |
|            | JRA-55                               | Japanese 55-year Reanalysis                                                                | R | 3 hourly | ~ 60 km | 1959-NRT     | Global | Kobayashi et al. (2015) |
|            | NCEP-CFSR                            | National Centers for Environmental Prediction                                              | R | Hourly   | 0.3125° | 1979-2010    | Global | Saha et al. (2010)      |

---

---

|        |           |                                                                        |   |         |        |              |        |                                          |
|--------|-----------|------------------------------------------------------------------------|---|---------|--------|--------------|--------|------------------------------------------|
| Ground |           | (NCEP) Climate Forecast System Reanalysis<br>(CFSR)                    |   |         |        |              |        |                                          |
|        | CPCU      | Climate Prediction Center (CPC) Unified                                | G | Daily   | 0.5°   | 1979-present | Global | Xie et al. (2007),<br>Chen et al. (2008) |
|        | CRU       | Climatic Research Unit (CRU) Time-Series<br>(TS)                       | G | Monthly | 0.5°   | 1901-2014    | Global | Harris et al. (2013)                     |
|        | GPCC      | Global Precipitation Climatology Centre<br>(GPCC) Full Data Reanalysis | G | Monthly | 0.5°   | 1901-present | Global | Schneider et al. (2014)                  |
|        | UDEL      | University of Delaware (UDEL)                                          | G | Monthly | 0.5°   | 1901-2014    | Global | Matsuura and Willmott<br>(2009)          |
|        | PREC/L    | PRECipitation REConstruction over Land<br>(PREC/L)                     | G | Monthly | 0.5°   | 1948-present | Global | Chen et al. (2002)                       |
|        | WorldClim | WorldClim V2.0 monthly climatic dataset,                               | G | Monthly | ~ 1 km | Climatic     | Global | Fick and Hijmans                         |

---

---

|                            |              |                                                                                                                                          |      |          |       |              |        |                       |
|----------------------------|--------------|------------------------------------------------------------------------------------------------------------------------------------------|------|----------|-------|--------------|--------|-----------------------|
|                            |              | corrected for gauge-undercatch and                                                                                                       |      |          |       |              |        | (2017)                |
|                            |              | orographic effects                                                                                                                       |      |          |       |              |        |                       |
|                            | IMERG-Final  | Integrated Multisatellite Retrievals for Global<br>Precipitation Measurement Final Run                                                   | S, G | 30 min   | 0.1°  | 2000-present | 60°N/S | Huffman et al. (2019) |
|                            | TMPA 3B42    | TRMM Multi-satellite Precipitation Analysis<br>(TMPA) 3B42 V7                                                                            | S, G | 3 hourly | 0.25° | 2000-2020    | 50°N/S | Huffman et al. (2007) |
| Gauge-adjusted<br>products | GSMaP-Gauge  | Gauge-adjusted Global Satellite Mapping of<br>Precipitation                                                                              | S, G | Hourly   | 0.1°  | 2000-present | 60°N/S | Mega et al. (2019)    |
|                            | PERSIANN-CDR | Precipitation Estimation from Remotely<br>Sensed Information using Artificial Neural<br>Networks (PERSIANN) Climate Data Record<br>(CDR) | S, G | Daily    | 0.25° | 1983-present | 60°N/S | Ashouri et al. (2015) |
|                            | CHIRPS       | Climate Hazards group Infrared Precipitation                                                                                             | S, G | Daily    | 0.05° | 1981-present | 50°N/S | Funk et al. (2015)    |

---

---

|            |                                                                                            |      |          |            |              |        |                           |
|------------|--------------------------------------------------------------------------------------------|------|----------|------------|--------------|--------|---------------------------|
|            | with Station                                                                               |      |          |            |              |        |                           |
| CMORPH-CRT | Climate Prediction Center (CPC) MORPHing<br>technique bias corrected                       | S, G | 3 hourly | 0.25°      | 1998-present | 60°N/S | Joyce et al. (2004)       |
| GPCP 2.3   | Global Precipitation Climatology Project<br>(GPCP) monthly analysis product V2.3           | S, G | Monthly  | 2.5°       | 1996-NRT     | Global | Adler et al. (2003, 2018) |
| MERRA-2    | Modern-Era Retrospective analysis for<br>Research and Applications, version 2<br>(MERRA-2) | R, G | Hourly   | ~ 50 km    | 1980-NRT     | Global | Reichle et al. (2017)     |
| MERRA-Land | Modern Era Retrospective-Analysis for<br>Research and Applications (MERRA)-Land            | R, G | Hourly   | 0.5°×0.67° | 1979-present | Global | Reichle et al. (2011)     |
| PFD        | Princeton global meteorological Forcing<br>Dataset                                         | R, G | 3 hourly | 0.25°      | 1948-2012    | Global | Sheffield et al. (2006)   |
| WFDEI      | WATCH Forcing Data ERA-Interim (WFDEI)                                                     | R, G | 3 hourly | 0.25°      | 1979-2014    | Global | Weedon et al. (2014)      |

---

---

|              |            |                            |          |          |               |          |        |              |           |                          |            |
|--------------|------------|----------------------------|----------|----------|---------------|----------|--------|--------------|-----------|--------------------------|------------|
| Multi-source | MSWEP V2.8 | Multi-Source               | Weighted | Ensemble | R, G, S       | 3 hourly | 0.1°   | 1979-present | Global    | Beck et al. (2017, 2019) |            |
| merged       |            | Precipitation (MSWEP) V2.8 |          |          |               |          |        |              |           |                          |            |
| products     | MGP        | Multi-source               | Merged   | Global   | Precipitation | R, G, S  | Hourly | 0.25°        | 2001-2020 | Land                     | This study |
|              |            | Product (MGP)              |          |          |               |          |        |              |           |                          |            |

---

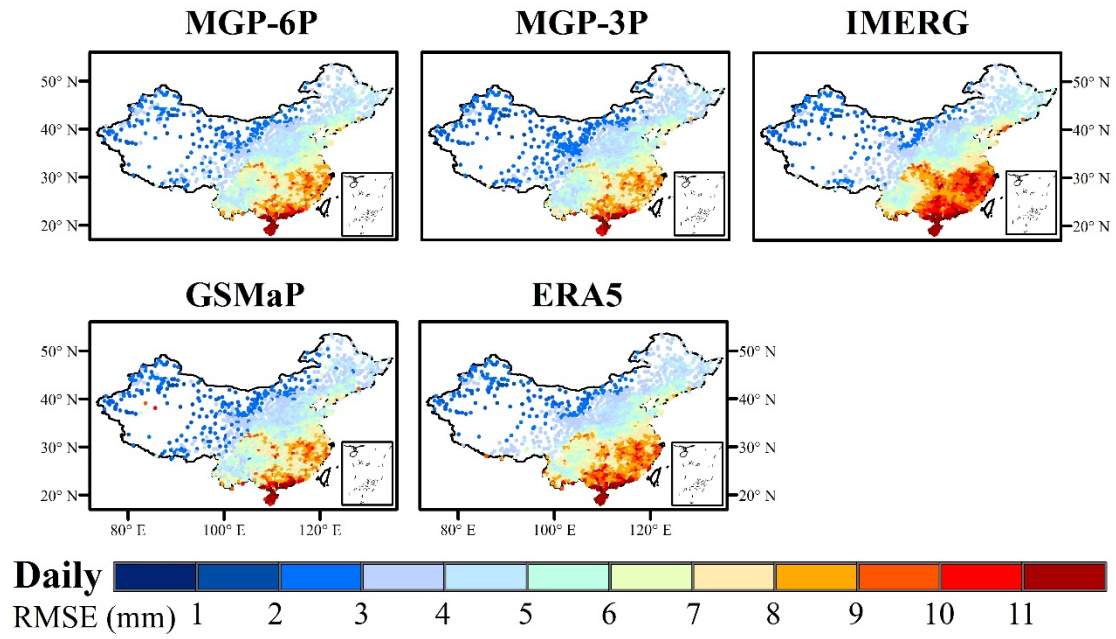

**Fig. S1** Spatial maps of RMSE for the five global precipitation products (i.e., MGP-6P, MGP-3P, IMERG, GSMaP, and ERA5) at a daily scale over mainland China.

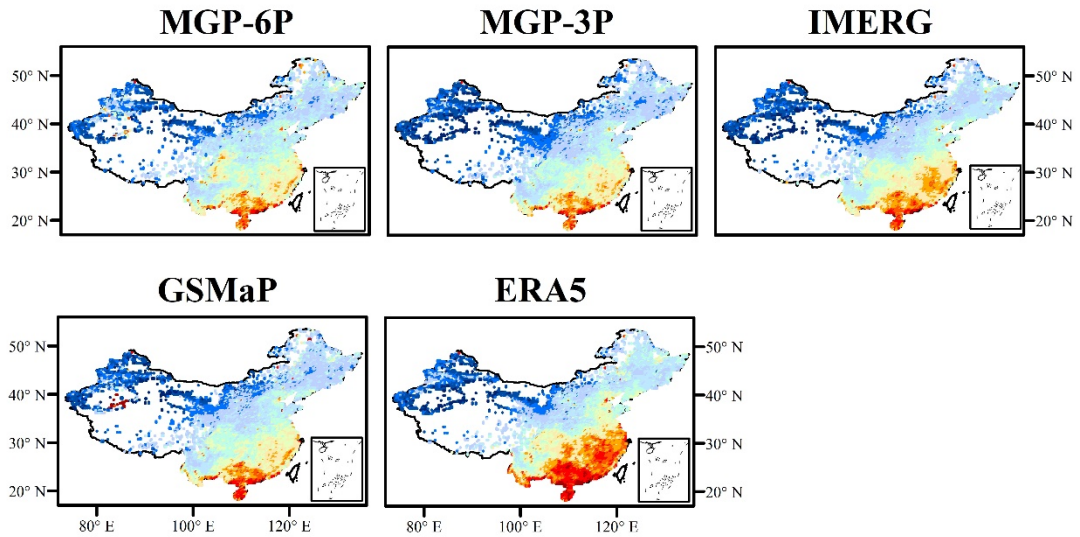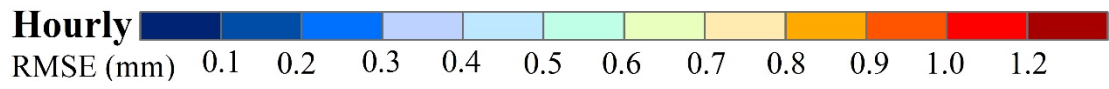

**Fig. S2** Spatial maps of RMSE for the five global precipitation products (i.e., MGP-6P, MGP-3P, IMERG, GSMaP, and ERA5) at an hourly scale over mainland China.



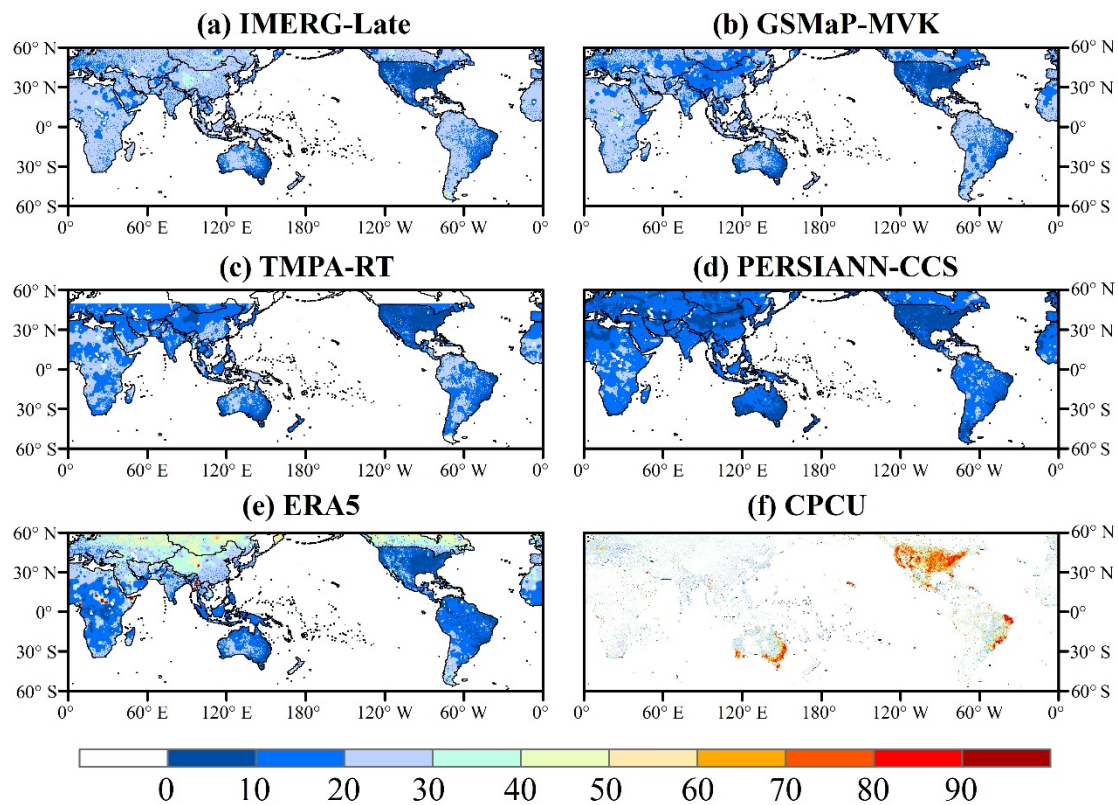

**Fig. S3** Global land maps of the weights designed to satellites (i.e., IMERG-Late, GSMaP-MVK, TMPA-RT, and PERSIANN-CCS), reanalysis (i.e., ERA5), and CPCU for scheme 1 during MAM.

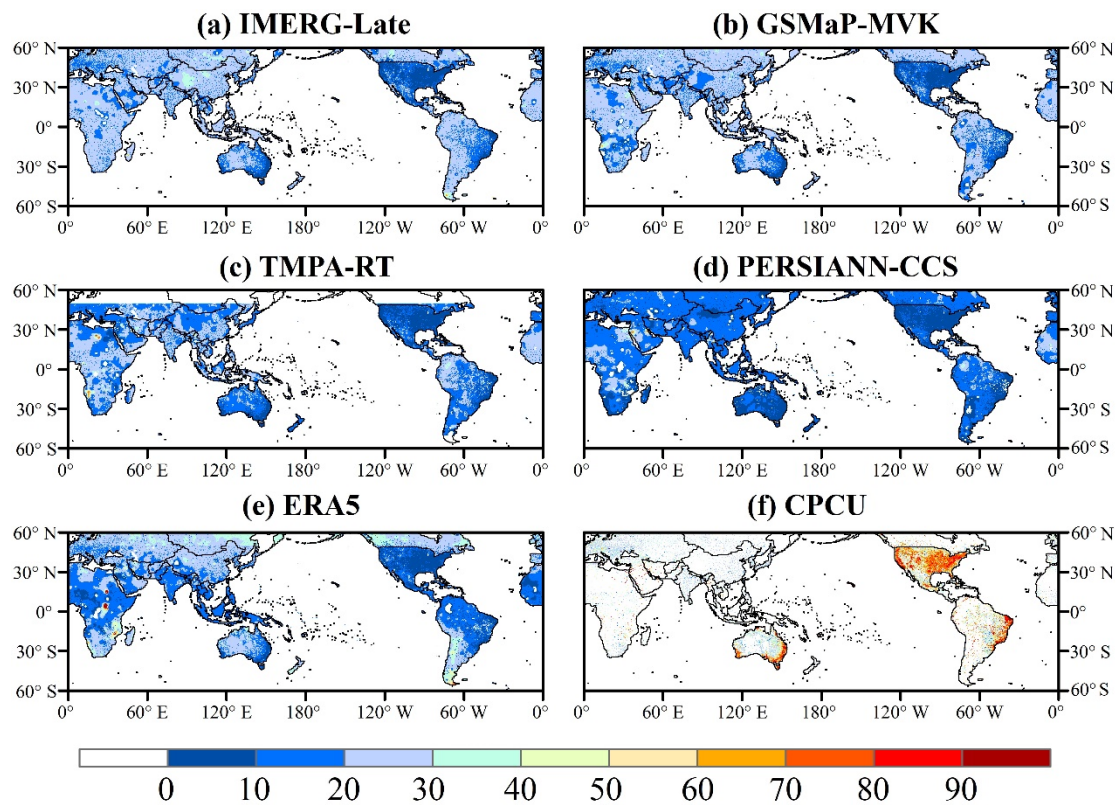

**Fig. S4** Global land maps of the weights designed to satellites (i.e., IMERG-Late, GSMaP-MVK, TMPA-RT, and PERSIANN-CCS), reanalysis (i.e., ERA5), and CPCU for scheme 1 during JJA.

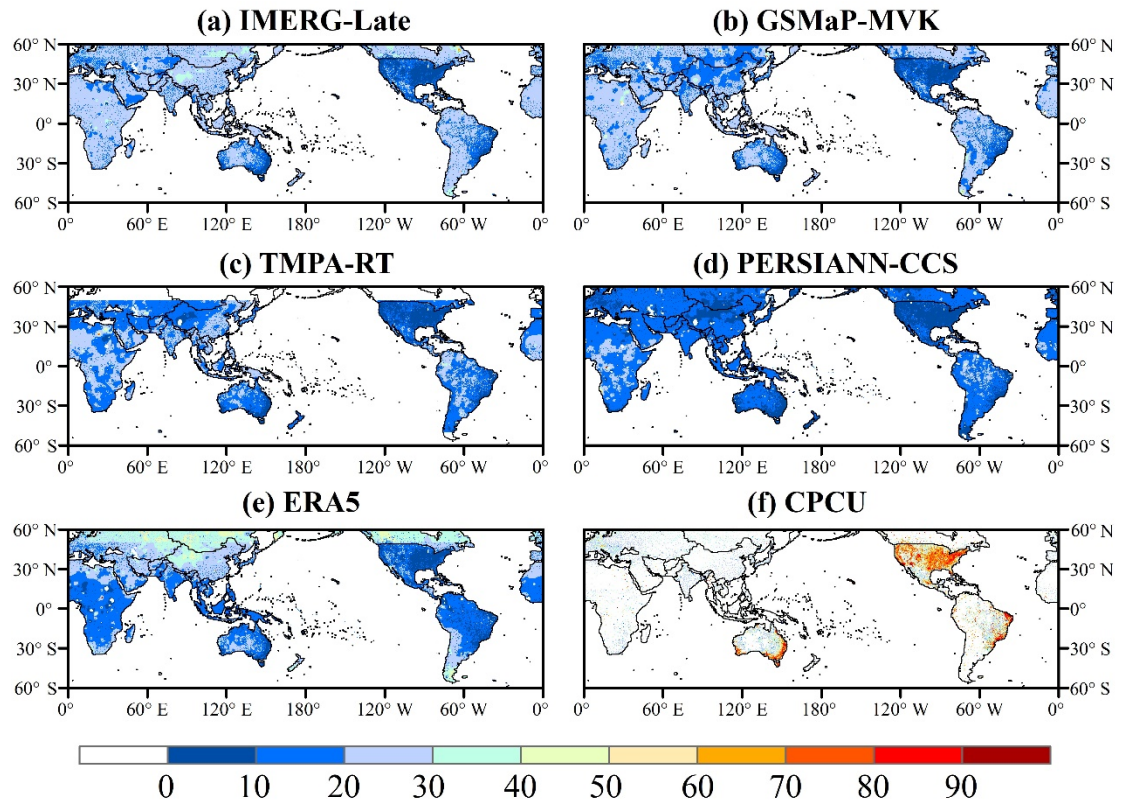

**Fig. S5** Global land maps of the weights designed to satellites (i.e., IMERG-Late, GSMaP-MVK, TMPA-RT, and PERSIANN-CCS), reanalysis (i.e., ERA5), and CPCU for scheme 1 during SON.

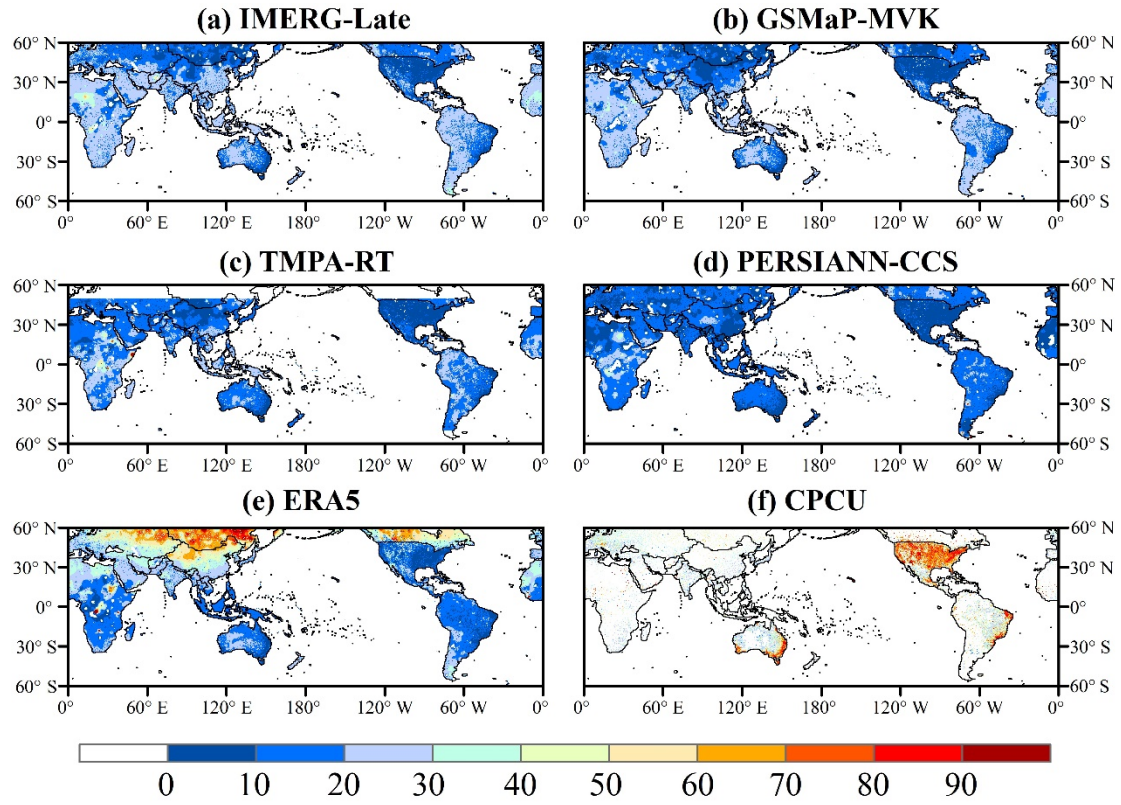

**Fig. S6** Global land maps of the weights designed to satellites (i.e., IMERG-Late, GSMaP-MVK, TMPA-RT, and PERSIANN-CCS), reanalysis (i.e., ERA5), and CPCU for scheme 1 during DJF.

## References

- Adler, R. F., Huffman, G. J., Chang, A., Ferraro, R., Xie, P. P., Janowiak, J., Rudolf, B., Schneider, U., Curtis, S., Bolvin, D., Gruber, A., Susskind, J., Arkin, P., and Nelkin, E.: The version-2 global precipitation climatology project (GPCP) monthly precipitation analysis (1979-present). *J. Hydrometeorol.* 4(6), 1147-1167, 2003.
- Adler, R. F., Sapiano, M. R., Huffman, G. J., Wang, J. J., Gu, G., Bolvin, D., Chiu, L., Schneider, U., Becker, A., Nelkin, E., Xie, P., Ferraro, R., and Shin, D. B.: The Global Precipitation Climatology Project (GPCP) monthly analysis (new version 2.3) and a review of 2017 global precipitation. *Atmos.* 9(4), 138, 2018.
- Ashouri, H., Hsu, K.L., Sorooshian, S., Braithwaite, D.K., Knapp, K.R., Cecil, L.D., Nelson, B.R., and Prat, O.P.: PERSIANN-CDR: Daily Precipitation Climate Data Record from Multisatellite Observations for Hydrological and Climate Studies. *B. Am. Meteorol. Soc.* 96, 6983. Doi: <https://dx.doi.org/10.1175/BAMS-D-13-00068.1>, 2015.
- Beck, H. E., Van Dijk, A. I., Levizzani, V., Schellekens, J., Miralles, D. G., Martens, B., and De Roo, A.: MSWEP: 3-hourly 0.25 global gridded precipitation (1979-2015) by merging gauge, satellite, and reanalysis data. *Hydrol. Earth Syst. Sci.* 21(1), 589-615, 2017.
- Beck, H. E., Wood, E. F., Pan, M., Fisher, C. K., Miralles, D. G., Van Dijk, A. I., McVicar, T. R., and Adler, R. F.: MSWEP V2 global 3-hourly 0.1 precipitation: methodology and quantitative assessment. *B. Am. Meteorol. Soc.* 100(3), 473-500, 2019.

- Brocca, L., Ciabatta, L., Massari, C., Moramarco, T., Hahn, S., Hasenauer, S., Kidd, R., Dorigo, W., Wagner, W., and Levizzani, V.: Soil as a natural rain gauge: Estimating global rainfall from satellite soil moisture data. *J. Geophys. Res.-Atmos.* 119(9), 5128-5141, 2014.
- Chen, M., Shi, W., Xie, P., Silva, V.B., Kousky, V.E., Wayne Higgins, R., and Janowiak, J.E.: Assessing objective techniques for gauge-based analyses of global daily precipitation. *J. Geophys. Res.-Atmos.* 113 (D4), D04110, 2008.
- Chen, M., Xie, P., Janowiak, J. E., and Arkin, P. A.: Global land precipitation: A 50-yr monthly analysis based on gauge observations. *J. Hydrometeorol.* 3(3), 249-266, 2002.
- Copernicus Climate Change Service (C3S): ERA5: Fifth Generation of ECMWF Atmospheric Reanalyses of the Global Climate. Copernicus Climate Change Service Climate Data Store (CDS) July 2019. <https://cds.climate.copernicus.eu/cdsapp#!/home>, 2017.
- Fick, S. E., and Hijmans, R. J.: WorldClim 2: new 1-km spatial resolution climate surfaces for global land areas. *Int. J. Climatol.* 37(12), 4302-4315, 2017.
- Funk, C., Verdin, A., Michaelsen, J., Peterson, P., Pedreros, D., and Husak, G.: A global satellite-assisted precipitation climatology. *Earth Syst. Sci. Data.* 7(2), 275-287, 2015.
- Harris, I. P. D. J., Jones, P. D., Osborn, T. J., and Lister, D. H.: Updated high-resolution grids of monthly climatic observations—the CRU TS3. 10 Dataset. *Int. J. Climatol.* 34(3), 623-642, 2014.

- Hong, Y., Hsu, K.L., Sorooshian, S., and Gao, X.: Precipitation estimation from remotely sensed imagery using an artificial neural network cloud classification system. *J. Appl. Meteorol.* 43, 1834-1853, 2004.
- Huffman, G. J., Bolvin, D. T., Nelkin, E. J., and Tan, J.: Integrated Multi-satellite Retrievals for GPM (IMERG) Technical Documentation, NASA/GSFC, pp. 1, 2019.
- Huffman, G.J., Adler, R.F., Bolvin, D.T., Gu, G., Nelkin, E.J., Bowman, K.P., Hong, Y., Stocker, E.F., and Wolff, D.B.: The TRMM multisatellite precipitation analysis (TMPA): quasi-global, multiyear, combined-sensor precipitation estimates at fine scales. *J. Hydrometeorol.* 8 (1), 38-55, 2007.
- Joyce, R.J., Janowiak, J.E., Arkin, P.A., and Xie, P.: CMORPH: a method that produces global precipitation estimates from passive microwave and infrared data at high spatial and temporal resolution. *J. Hydrometeorol.* 5 (3), 487-503, 2004.
- Knapp, K. R., Ansari, S., Bain, C. L., Bourassa, M. A., Dickinson, M. J., Funk, C., Helms, C.N., Hennon, C.C., Holmes, C.D., Huffman, G.J., Kossin, J.P., Lee, H.T., Loew, A., and Magnusdottir, G.: Globally gridded satellite observations for climate studies. *B. Am. Meteorol. Soc.* 92(7), 893-907, 2011.
- Kobayashi, S., Ota, Y., Harada, Y., Ebata, A., Moriya, M., Onoda, H., Onogi, K., Kamahori, H., Kobayashi, C., Endo, H., Miyaoka, K., and Takahashi, K.: The JRA-55 reanalysis: general specifications and basic characteristics. *J. Met. Soc. Japan* 93, 5-48, 2015.
- Matsuura, K., and Willmott, C. J.: Terrestrial precipitation: 1900-2008 gridded monthly

time series. Center for Climatic Research Department of Geography Center for Climatic Research, University of Delaware, 2009.

Mega, T., Ushio, T., Takahiro, M., Kubota, T., Kachi, M., and Oki, R.: Gauge-adjusted global satellite mapping of precipitation. *IEEE Trans. Geosci. Remote Sens.* 57 (4), 1928-1935, 2019.

Reichle, R. H., Koster, R. D., De Lannoy, G. J., Forman, B. A., Liu, Q., Mahanama, S. P., and Touré, A.: Assessment and enhancement of MERRA land surface hydrology estimates. *J. Clim.* 24(24), 6322-6338, 2011

Reichle, R. H., Liu, Q., Koster, R. D., Draper, C. S., Mahanama, S. P., and Partyka, G. S.: Land surface precipitation in MERRA-2. *J. Clim.* 30(5), 1643-1664, 2017.

Saha, S., Moorthi, S., Pan, H. L., Wu, X., Wang, J., Nadiga, S., Tripp, P., Kistler, R., Woollen, J., Behringer, D., Liu, H., Stokes, D., Grumbine, R., Gayno, G., Wang, J., Hou, Y. T., Chuang, H. Y., Juang, H. M. H., Sela, J., Iredell, M., Treadon, R., Kleist, D., Van Delst, P., Keyser, D., Derber, J., Ek, M., Meng, J., Wei, H., Yang, R., Lord, S., Van Den Dool, H., Kumar, A., Wang, W., Long, C., Chelliah, M., Xue, Y., Huang, B., Schemm, J. K., Ebisuzaki, W., Lin, R., Xie, P., Chen, M., Zhou, S., Higgins, W., Zou, C. Z., Liu, Q., Chen, Y., Han, Y., Cucurull, L., Reynolds, R. W., Rutledge, G., and Goldberg, M.: The NCEP climate forecast system reanalysis, *B. Am. Meteorol. Soc.* 91, 1015-1057, 2010.

Schneider, U., Becker, A., Finger, P., Meyer-Christoffer, A., Ziese, M., and Rudolf, B.: GPCP's new land surface precipitation climatology based on quality-controlled in situ data and its role in quantifying the global water cycle. *Theor. Appl.*



Climatol. 115(1), 15-40, 2014.

Sheffield, J., Goteti, G., and Wood, E. F.: Development of a 50-year high-resolution global dataset of meteorological forcings for land surface modeling. *J. Clim.* 19(13), 3088-3111, 2006.

Ushio, T., Sasashige, K., Kubota, T., Shige, S., Okamoto, K.I., Aonashi, K., Inoue, T., Takahashi, N., Iguchi, T., Kachi, M., Oki, R., Morimoto, T., and Kawasaki, Z.I.: A Kalman filter approach to the Global Satellite Mapping of Precipitation (GSMaP) from combined passive microwave and infrared radiometric data. *J. Meteorol. Soc. Jpn.* 137-151. <https://doi.org/10.2151/jmsj.87A.137>, 2009.

Weedon, G. P., Balsamo, G., Bellouin, N., Gomes, S., Best, M. J., and Viterbo, P.: The WFDEI meteorological forcing data set: WATCH Forcing Data methodology applied to ERA-Interim reanalysis data. *Water Resour. Res.* 50(9), 7505-7514, 2014.

Xie, P., Chen, M., Yang, S., Yatagai, A., Hayasaka, T., Fukushima, Y., and Liu, C.: A gauge-based analysis of daily precipitation over East Asia. *J. Hydrometeorol.* 8 (3), 607-626, 2007.
